# Supplementary material
Source: PubMed Central journal article supplement (PMC5710217)
Supplement: jamapsychiatry-74-1161-s001.pdf [file jamapsychiatry-74-1161-s001.pdf]

## Supplementary Online Content

Chalkia D, Singh LN, Leipzig J, et al. Association between mitochondrial DNA haplogroup variation and autism spectrum disorders. *JAMA Psychiatry*. Published online August 23, 2017. doi:10.1001/jamapsychiatry.2017.2604

**eTable 1.** List of 163 Illumina 550 Chip SNPs

**eTable 2.** Correspondence Between Haplogroup Calls Using 30,893 Whole mtDNA Sequences

This supplementary material has been provided by the authors to give readers additional information about their work.

eTable 1. List of 163 Illumina 550 Chip SNPs

| Position | rCRS Ref | Mutant |
|----------|----------|--------|
| 182      | C        | T      |
| 217      | T        | C      |
| 228      | G        | A      |
| 247      | G        | A      |
| 250      | T        | C      |
| 295      | C        | T      |
| 456      | C        | T      |
| 462      | C        | T      |
| 477      | T        | C      |
| 489      | T        | C      |
| 750      | A        | G      |
| 827      | A        | G      |
| 1018     | G        | A      |
| 1048     | C        | T      |
| 1189     | T        | C      |
| 1438     | A        | G      |
| 1719     | G        | A      |
| 1736     | A        | G      |
| 2158     | T        | C      |
| 2352     | T        | C      |
| 2483     | T        | C      |
| 2706     | A        | G      |
| 2789     | C        | T      |
| 2885     | T        | C      |
| 3010     | G        | A      |
| 3197     | T        | C      |
| 3348     | A        | G      |
| 3394     | T        | C      |
| 3480     | A        | G      |
| 3547     | A        | G      |
| 3594     | C        | T      |
| 3666     | G        | A      |
| 3720     | A        | G      |
| 3915     | G        | A      |

|      |   |   |
|------|---|---|
| 3918 | G | A |
| 3970 | C | T |
| 3992 | C | T |
| 4024 | A | G |
| 4104 | A | G |
| 4336 | T | C |
| 4561 | T | C |
| 4639 | T | C |
| 4769 | A | G |
| 4820 | G | A |
| 4824 | A | G |
| 4883 | C | T |
| 4917 | A | G |
| 4977 | T | C |
| 5004 | T | C |
| 5046 | G | A |
| 5178 | C | A |
| 5263 | C | T |
| 5390 | A | G |
| 5442 | T | C |
| 5460 | G | A |
| 5495 | T | C |
| 5656 | A | G |
| 5773 | G | A |
| 5951 | A | G |
| 6026 | G | A |
| 6045 | C | T |
| 6071 | T | C |
| 6152 | T | C |
| 6221 | T | C |
| 6260 | G | A |
| 6365 | T | C |
| 6455 | C | T |
| 6680 | T | C |
| 6734 | G | A |
| 6752 | A | G |
| 6776 | T | C |

|       |   |   |
|-------|---|---|
| 6719  | T | C |
| 7055  | A | G |
| 7175  | T | C |
| 7256  | C | T |
| 7274  | C | T |
| 7521  | G | A |
| 7768  | A | G |
| 8206  | G | A |
| 8269  | G | A |
| 8277  | T | C |
| 8616  | G | T |
| 8655  | C | T |
| 8869  | A | G |
| 9072  | A | G |
| 9093  | A | G |
| 9221  | A | G |
| 9377  | A | G |
| 9540  | T | C |
| 9667  | A | G |
| 9698  | T | C |
| 9716  | T | C |
| 9899  | T | C |
| 9950  | T | C |
| 10034 | T | C |
| 10044 | A | G |
| 10238 | T | C |
| 10310 | G | A |
| 10321 | T | C |
| 10398 | A | G |
| 10463 | T | C |
| 10550 | A | G |
| 10586 | G | A |
| 10589 | G | A |
| 10688 | G | A |
| 10873 | T | C |
| 10915 | T | C |
| 11251 | A | G |

|       |   |   |
|-------|---|---|
| 11377 | G | A |
| 11467 | A | G |
| 11485 | T | C |
| 11722 | T | C |
| 11812 | A | G |
| 11899 | T | C |
| 11914 | G | A |
| 11969 | G | A |
| 12308 | A | G |
| 12372 | G | A |
| 12414 | T | C |
| 12630 | G | A |
| 12669 | C | T |
| 12705 | C | T |
| 12850 | A | G |
| 13105 | A | G |
| 13263 | A | G |
| 13650 | C | T |
| 13780 | A | G |
| 13789 | T | C |
| 13965 | T | C |
| 14178 | T | C |
| 14212 | T | C |
| 14233 | A | G |
| 14582 | A | G |
| 14766 | C | T |
| 14783 | T | C |
| 14798 | T | C |
| 15043 | G | A |
| 15110 | G | A |
| 15218 | A | G |
| 15244 | A | G |
| 15257 | G | A |
| 15301 | G | A |
| 15535 | C | T |
| 15670 | T | C |
| 15758 | A | G |

|       |   |   |
|-------|---|---|
| 15784 | T | C |
| 15833 | C | T |
| 15904 | C | T |
| 15924 | A | G |
| 15928 | G | A |
| 15930 | G | A |
| 16129 | G | A |
| 16144 | T | C |
| 16145 | G | A |
| 16148 | C | T |
| 16162 | A | G |
| 16163 | A | G |
| 16183 | A | C |
| 16270 | C | T |
| 16278 | C | T |
| 16327 | C | T |
| 16390 | G | A |
| 16391 | G | A |

**eTable 2.** Correspondence Between Haplogroup Calls Using 30,893 Whole mtDNA Sequences<sup>a</sup>

| Predicted HG |     |      |     |      |     |     |     |      |     |     |      |      |      |     |     |   |   |   |    |     |   |   |   |   |   |   |   |   |
|--------------|-----|------|-----|------|-----|-----|-----|------|-----|-----|------|------|------|-----|-----|---|---|---|----|-----|---|---|---|---|---|---|---|---|
| HG           | A   | B    | C   | D    | E   | F   | G   | H    | H V | I   | J    | K    | L    | M * | N * | O | P | Q | R  | R 0 | S | T | U | V | W | X | Y | Z |
| A            | 739 | 0    | 0   | 0    | 0   | 0   | 0   | 0    | 0   | 0   | 0    | 0    | 0    | 0   | 0   | 0 | 0 | 0 | 0  | 0   | 0 | 0 | 0 | 0 | 0 | 0 | 0 | 0 |
| B            | 0   | 1879 | 0   | 0    | 0   | 0   | 0   | 2    | 0   | 0   | 0    | 0    | 0    | 0   | 0   | 0 | 1 | 0 | 10 | 86  | 0 | 0 | 0 | 0 | 0 | 0 | 0 | 0 |
| C            | 0   | 0    | 748 | 0    | 0   | 0   | 0   | 0    | 0   | 0   | 0    | 0    | 0    | 0   | 0   | 0 | 0 | 0 | 0  | 0   | 0 | 0 | 0 | 0 | 0 | 0 | 0 | 0 |
| D            | 0   | 0    | 0   | 1437 | 0   | 0   | 0   | 0    | 0   | 0   | 0    | 0    | 0    | 1   | 0   | 0 | 0 | 0 | 0  | 0   | 0 | 0 | 0 | 0 | 0 | 0 | 0 | 0 |
| E            | 0   | 0    | 0   | 0    | 246 | 0   | 0   | 0    | 0   | 0   | 0    | 0    | 0    | 3   | 0   | 0 | 0 | 0 | 0  | 0   | 0 | 0 | 0 | 0 | 0 | 0 | 0 | 0 |
| F            | 0   | 4    | 0   | 0    | 0   | 459 | 0   | 0    | 0   | 0   | 0    | 0    | 0    | 0   | 0   | 0 | 0 | 0 | 2  | 0   | 0 | 0 | 0 | 0 | 0 | 0 | 0 | 0 |
| G            | 0   | 0    | 0   | 0    | 4   | 0   | 128 | 0    | 0   | 0   | 0    | 0    | 0    | 78  | 0   | 0 | 0 | 0 | 0  | 0   | 0 | 0 | 0 | 0 | 0 | 0 | 0 | 0 |
| H            | 0   | 0    | 0   | 0    | 0   | 0   | 0   | 5531 | 35  | 0   | 0    | 0    | 0    | 0   | 0   | 0 | 0 | 0 | 0  | 0   | 0 | 0 | 0 | 0 | 0 | 0 | 0 | 0 |
| H V          | 0   | 0    | 0   | 0    | 0   | 0   | 0   | 4    | 363 | 0   | 0    | 0    | 0    | 0   | 0   | 0 | 0 | 0 | 0  | 0   | 0 | 0 | 0 | 0 | 0 | 0 | 0 | 0 |
| I            | 0   | 0    | 0   | 0    | 0   | 0   | 0   | 0    | 0   | 303 | 0    | 0    | 0    | 0   | 0   | 0 | 0 | 0 | 0  | 0   | 0 | 0 | 0 | 0 | 0 | 0 | 0 | 0 |
| J            | 0   | 0    | 0   | 0    | 0   | 0   | 0   | 0    | 0   | 0   | 1089 | 0    | 0    | 0   | 0   | 0 | 0 | 0 | 0  | 0   | 0 | 0 | 0 | 0 | 0 | 0 | 0 | 0 |
| K            | 0   | 0    | 0   | 0    | 0   | 0   | 0   | 0    | 0   | 0   | 0    | 1205 | 0    | 0   | 0   | 0 | 0 | 0 | 0  | 0   | 0 | 0 | 0 | 0 | 0 | 0 | 0 | 0 |
| L            | 0   | 0    | 0   | 0    | 0   | 0   | 0   | 0    | 0   | 0   | 0    | 0    | 2892 | 0   | 0   | 0 | 0 | 0 | 0  | 0   | 0 | 0 | 0 | 0 | 0 | 0 | 0 | 0 |
| M            | 0   | 0    | 0   | 0    | 1   | 0   | 10  | 0    | 0   | 0   | 0    | 0    | 0    | 22  | 0   | 0 | 0 | 5 | 0  | 0   | 0 | 0 | 0 | 0 | 0 | 0 | 0 | 0 |

|          |   |           |   |   |   |   |   |   |           |   |   |   |   |           |           |           |          |           |           |           |   |           |           |           |          |           |           |   |
|----------|---|-----------|---|---|---|---|---|---|-----------|---|---|---|---|-----------|-----------|-----------|----------|-----------|-----------|-----------|---|-----------|-----------|-----------|----------|-----------|-----------|---|
| *        |   |           |   |   |   |   |   |   |           |   |   |   |   |           | <b>93</b> |           |          |           |           |           |   |           |           |           |          |           |           |   |
| <b>N</b> | 0 | 0         | 0 | 0 | 0 | 0 | 0 | 0 | 0         | 0 | 0 | 0 | 0 | 0         | 0         | <b>41</b> | 0        | 0         | 0         | 0         | 0 | 0         | 0         | 0         | 0        | 0         | 0         | 0 |
| *        |   |           |   |   |   |   |   |   |           |   |   |   |   |           | <b>2</b>  |           |          |           |           |           |   |           |           |           |          |           |           |   |
| <b>O</b> | 0 | 0         | 0 | 0 | 0 | 0 | 0 | 0 | 0         | 0 | 0 | 0 | 0 | 0         | 0         | <b>3</b>  | 0        | 0         | 0         | 0         | 0 | 0         | 0         | 0         | 0        | 0         | 0         | 0 |
| <b>P</b> | 0 | 0         | 0 | 0 | 0 | 0 | 0 | 0 | 0         | 0 | 0 | 0 | 0 | 0         | 0         | 0         | <b>1</b> | 0         | <b>3</b>  | <b>33</b> | 0 | 0         | 0         | 0         | 0        | 0         | 0         | 0 |
|          |   |           |   |   |   |   |   |   |           |   |   |   |   |           |           | <b>7</b>  |          |           |           |           |   |           |           |           |          |           |           |   |
| <b>Q</b> | 0 | 0         | 0 | 0 | 0 | 0 | 0 | 0 | 0         | 0 | 0 | 0 | 0 | <b>14</b> | 0         | 0         | 0        | <b>12</b> | 0         | 0         | 0 | 0         | 0         | 0         | 0        | 0         | 0         |   |
|          |   |           |   |   |   |   |   |   |           |   |   |   |   |           |           |           | <b>7</b> |           |           |           |   |           |           |           |          |           |           |   |
| <b>R</b> | 0 | <b>12</b> | 0 | 0 | 0 | 0 | 0 | 0 | <b>5</b>  | 0 | 0 | 0 | 0 | 0         | 0         | 0         | 0        | <b>23</b> | <b>69</b> | 0         | 0 | 0         | 0         | 0         | 0        | 0         | 0         |   |
|          |   |           |   |   |   |   |   |   |           |   |   |   |   |           |           |           |          | <b>8</b>  |           |           |   |           |           |           |          |           |           |   |
| <b>R</b> | 0 | <b>6</b>  | 0 | 0 | 0 | 0 | 0 | 0 | <b>1</b>  | 0 | 0 | 0 | 0 | 0         | 0         | 0         | 0        | <b>9</b>  | <b>16</b> | 0         | 0 | 0         | 0         | 0         | 0        | 0         | 0         |   |
| <b>0</b> |   |           |   |   |   |   |   |   |           |   |   |   |   |           |           |           |          | <b>9</b>  | <b>9</b>  |           |   |           |           |           |          |           |           |   |
| <b>S</b> | 0 | 0         | 0 | 0 | 0 | 0 | 0 | 0 | 0         | 0 | 0 | 0 | 0 | 0         | <b>10</b> | 0         | 0        | 0         | 0         | 0         | 0 | <b>2</b>  | 0         | 0         | 0        | 0         | 0         |   |
| <b>T</b> | 0 | 0         | 0 | 0 | 0 | 0 | 0 | 0 | 0         | 0 | 0 | 0 | 0 | 0         | 0         | 0         | 0        | 0         | 0         | 0         | 0 | <b>11</b> | 0         | 0         | 0        | 0         | 0         |   |
|          |   |           |   |   |   |   |   |   |           |   |   |   |   |           |           |           |          |           |           |           |   | <b>90</b> |           |           |          |           |           |   |
| <b>U</b> | 0 | 0         | 0 | 0 | 0 | 0 | 0 | 0 | 0         | 0 | 0 | 0 | 0 | 0         | 0         | 0         | 0        | 0         | 0         | 0         | 0 | 0         | <b>21</b> | 0         | 0        | 0         | 0         |   |
|          |   |           |   |   |   |   |   |   |           |   |   |   |   |           |           |           |          |           |           |           |   |           | <b>55</b> |           |          |           |           |   |
| <b>V</b> | 0 | 0         | 0 | 0 | 0 | 0 | 0 | 0 | <b>27</b> | 0 | 0 | 0 | 0 | 0         | 0         | 0         | 0        | 0         | 0         | 0         | 0 | 0         | 0         | <b>15</b> | 0        | 0         | 0         |   |
|          |   |           |   |   |   |   |   |   | <b>4</b>  |   |   |   |   |           |           |           |          |           |           |           |   |           |           | <b>1</b>  |          |           |           |   |
| <b>W</b> | 0 | 0         | 0 | 0 | 0 | 0 | 0 | 0 | 0         | 0 | 0 | 0 | 0 | 0         | 0         | 0         | 0        | 0         | 0         | 0         | 0 | 0         | 0         | <b>31</b> | 0        | 0         | 0         |   |
|          |   |           |   |   |   |   |   |   |           |   |   |   |   |           |           |           |          |           |           |           |   |           |           | <b>7</b>  |          |           |           |   |
| <b>X</b> | 0 | 0         | 0 | 0 | 0 | 0 | 0 | 0 | 0         | 0 | 0 | 0 | 0 | 0         | 0         | <b>4</b>  | 0        | 0         | 0         | 0         | 0 | 0         | 0         | 0         | 0        | <b>26</b> | 0         |   |
|          |   |           |   |   |   |   |   |   |           |   |   |   |   |           |           |           |          |           |           |           |   |           |           |           | <b>0</b> | 0         | 0         |   |
| <b>Y</b> | 0 | 0         | 0 | 0 | 0 | 0 | 0 | 0 | 0         | 0 | 0 | 0 | 0 | 0         | 0         | 0         | 0        | 0         | 0         | 0         | 0 | 0         | 0         | 0         | 0        | 0         | <b>9</b>  |   |
|          |   |           |   |   |   |   |   |   |           |   |   |   |   |           |           |           |          |           |           |           |   |           |           |           |          | <b>5</b>  | 0         |   |
| <b>Z</b> | 0 | 0         | 0 | 0 | 0 | 0 | 0 | 0 | 0         | 0 | 0 | 0 | 0 | 0         | 0         | 0         | 0        | 0         | 0         | 0         | 0 | 0         | 0         | 0         | 0        | 0         | <b>12</b> |   |
|          |   |           |   |   |   |   |   |   |           |   |   |   |   |           |           |           |          |           |           |           |   |           |           |           |          |           | <b>3</b>  |   |

<sup>a</sup>The same data set was analyzed but only examined the 163 Illumina mtdna snps (columns correspond to HG predicted based on the 163 snps and rows correspond to hgs assigned based on complete mtdna sequences)
